# Supplementary material for: Construction of Tongue Image-Based Machine Learning Model for Screening Patients with Gastric Precancerous Lesions
Source: MDPI journal article supplement (doi:10.3390/jpm13020271), 2023-01-31

## Supplementary

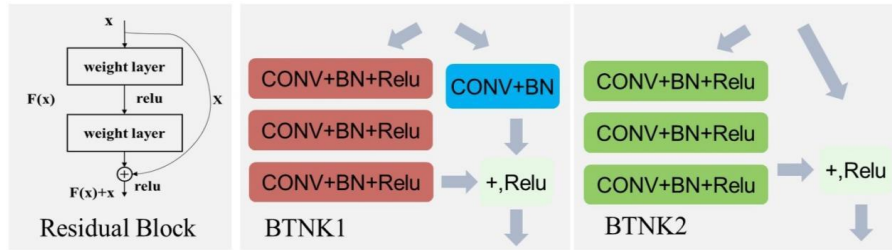

**Figure S1.** The residual module of the ResNet50 model.

**Table S1.** Univariate and multivariate analysis of symptoms factors in PLGC screening.

| Variable         | Total (N = 1995) No. (%) | Non-PLGC (N = 1824) No. (%) | PLGC (N = 171) No. (%) | P value*               | Adjusted OR (95% Ci) † | P value#               |
|------------------|--------------------------|-----------------------------|------------------------|------------------------|------------------------|------------------------|
| Symptoms Factors |                          |                             |                        |                        |                        |                        |
| Xerostomia       |                          |                             |                        | 5.9 X 10 <sup>-6</sup> |                        |                        |
| Yes              | 642(0.32)                | 560(0.31)                   | 82(0.48)               |                        | 2.07([1.41,3.04])      | 1.9 X 10 <sup>-4</sup> |
| No               | 1353(0.68)               | 1264(0.69)                  | 89(0.52)               |                        |                        |                        |
| Bitter Taste     |                          |                             |                        | 2.7 X 10 <sup>-2</sup> |                        |                        |
| Yes              | 412(0.21)                | 365(0.20)                   | 47(0.27)               |                        | 1.54([1.01,2.36])      | 4.7 X 10 <sup>-2</sup> |
| No               | 1583(0.79)               | 1459(0.80)                  | 124(0.73)              |                        |                        |                        |
| Belching         |                          |                             |                        | 2.7 X 10 <sup>-2</sup> |                        |                        |
| Yes              | 518(0.26)                | 461(0.25)                   | 57(0.33)               |                        | 1.72([1.15,2.56])      | 7.9 X 10 <sup>-3</sup> |
| No               | 1477(0.74)               | 1363(0.75)                  | 114(0.67)              |                        |                        |                        |

P value\* refer to the univariate analysis. P value# refer to the multivariate analysis (with adjustment for gender and age).

†Variables without significance (p>0.05) are not shown.

**Table S2.** Univariate analysis of tongue diagnostic and symptoms factors in PLGC screening.

| Variable                 | Total (N = 1995) No. (%) | Non-PLGC (N = 1824) No. (%) | PLGC (N = 171) No. (%) | P value | OR (95% Ci)       |
|--------------------------|--------------------------|-----------------------------|------------------------|---------|-------------------|
| Tongue Diagnostic Labels |                          |                             |                        |         |                   |
| Teeth Marks              |                          |                             |                        | 0.49    |                   |
| Yes                      | 347(0.17)                | 321(0.18)                   | 26(0.15)               |         | 0.84([0.54,1.30]) |
| No                       | 1648(0.83)               | 1503(0.82)                  | 145(0.85)              |         |                   |
| Spotted                  |                          |                             |                        | 0.51    |                   |
| Yes                      | 29(0.01))                | 28(0.02)                    | 1(0.01)                |         | 0.38([0.06,2.58]) |
| No                       | 1966(0.99)               | 1796(0.98)                  | 170(0.99)              |         |                   |
| Symptoms Factors         |                          |                             |                        |         |                   |
| Stomach Dull Pain        |                          |                             |                        | 0.17    |                   |
| Yes                      | 273(0.14)                | 256(0.14)                   | 17(0.10)               |         | 0.68([0.40,1.13]) |
| No                       | 1722(0.86)               | 1568(0.86)                  | 154(0.90)              |         |                   |
| Constipated              |                          |                             |                        | 0.20    |                   |

|                    |            |            |           |      |                   |
|--------------------|------------|------------|-----------|------|-------------------|
| Yes                | 104(0.05)  | 91(0.05)   | 13(0.08)  |      | 1.57([0.86,2.85]) |
| No                 | 1891(0.95) | 1733(0.95) | 158(0.92) |      |                   |
| Stomach Bloating   |            |            |           | 0.33 |                   |
| Yes                | 1491(0.75) | 1369(0.75) | 122(0.71) |      | 0.83([0.58,1.17]) |
| No                 | 504(0.25)  | 455(0.25)  | 49(0.29)  |      |                   |
| Belching           |            |            |           | 0.38 |                   |
| Yes                | 1108(0.56) | 1019(0.56) | 89(0.52)  |      | 0.86([0.63,1.17]) |
| No                 | 887(0.44)  | 805(0.44)  | 82(0.48)  |      |                   |
| Loose Stools       |            |            |           | 0.60 |                   |
| Yes                | 53(0.03)   | 50(0.03)   | 3(0.02)   |      | 0.63([0.20,2.03]) |
| No                 | 1942(0.97) | 1774(0.97) | 168(0.98) |      |                   |
| Stomach Stinging   |            |            |           | 0.60 |                   |
| Yes                | 66(0.03)   | 62(0.03)   | 4(0.02)   |      | 0.68([0.25,1.88]) |
| No                 | 1929(0.97) | 1762(0.97) | 167(0.98) |      |                   |
| Gastric Cardialgia |            |            |           | 1.0  |                   |
| Yes                | 38(0.02)   | 35(0.02)   | 3(0.02)   |      | 0.91([0.28,3.00]) |
| No                 | 1957(0.98) | 1789(0.98) | 168(0.98) |      |                   |

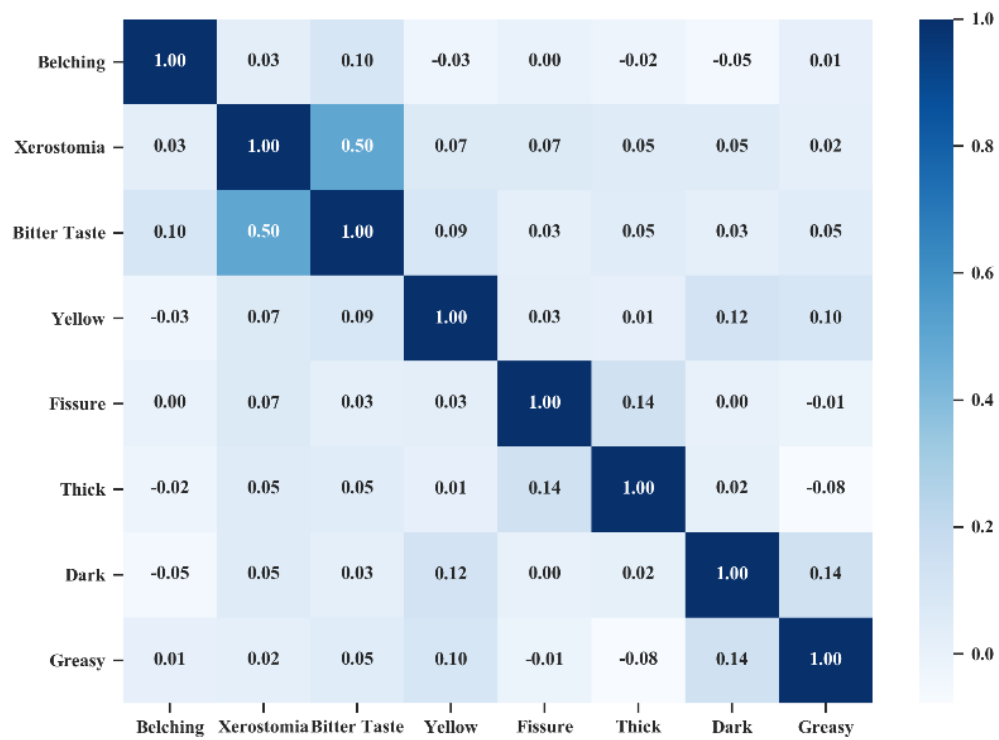

Figure S2. Correlation analysis of TDL and symptoms.

Table S3. The univariate analysis of tongue diagnostic labels in risk prediction of PLGC.

| Characteristics  | Pro (26) Num<br>(Rate) | non-Pro (69) Num<br>(Rate) | OR   | P value |
|------------------|------------------------|----------------------------|------|---------|
| Coating (Yellow) | 10(0.38)               | 6(0.09)                    | 6.35 | 2.1e-3  |
| Greasy           | 6(0.23)                | 15(0.22)                   | 1.04 | 1.00    |
| Fissure          | 5(0.19)                | 8(0.12)                    | 1.76 | 0.56    |
| Coating (Thick)  | 8(0.31)                | 11(0.16)                   | 2.26 | 0.21    |
| Dark             | 3(0.15)                | 7(0.16)                    | 0.96 | 1.00    |

Figure S3. The operation interface of the App.

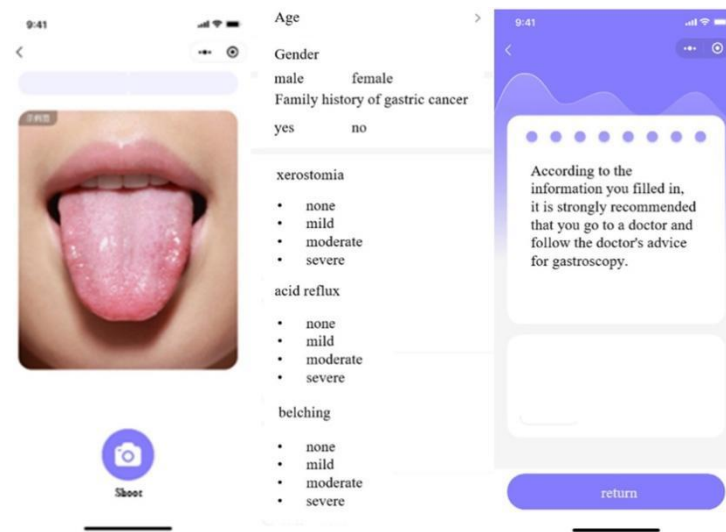

Supplement: s1 [file s1]
